# Supplementary material for: Retention and Fouling during Nanoparticle Filtration: Implications for Membrane Purification of Biotherapeutics
Source: MDPI journal article supplement (doi:10.3390/membranes12030299), 2022-03-07
Supplement: s1 [file s1]

# Retention and Fouling during Nanoparticle Filtration: Implications for Membrane Purification of Biotherapeutics

Liang-Kai Chu <sup>1</sup>, S. Ranil Wickramasinghe <sup>2</sup>, Xianghong Qian <sup>3</sup> and Andrew L. Zydney <sup>1,\*</sup>

<sup>1</sup> Department of Chemical Engineering, The Pennsylvania State University, University Park, PA 16802, USA; lxc5534@psu.edu (L.-K.C.)

<sup>2</sup> Ralph E. Martin Department of Chemical Engineering, University of Arkansas, Fayetteville, AK 72701, USA; swickram@uark.edu (S.R.W.)

<sup>3</sup> Department of Biomedical Engineering, University of Arkansas, Fayetteville, AK 72701, USA; xqian@uark.edu (X.Q.)

\* Correspondence: zydney@engr.psu.edu

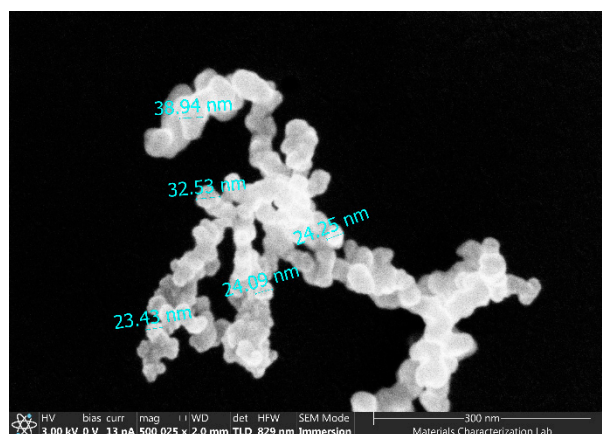

**Figure S1.** Image of polystyrene latex particles obtained by SEM (Thermo-Fisher Scientific APREO-S, U.S.A.). Particle suspension was air dried overnight on a silicon wafer and sputter-coated with iridium to generate an approximately 3 nm coating using an Emitech sputter coater (Quorum Technologies Ltd, UK). The particle aggregate is formed during the drying process.

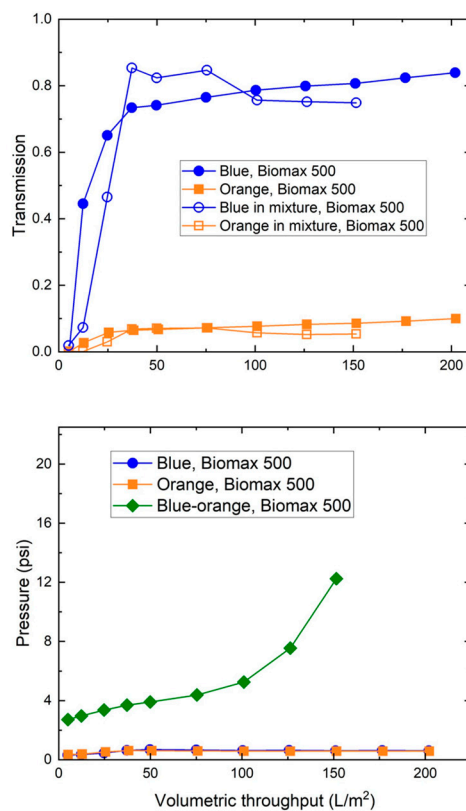

**Figure S2.** Particle transmission (top panel) and transmembrane pressure (bottom panel) for filtration of the blue and orange nanoparticles, both alone and in a binary mixture, through the 500 kDa Biomax membranes at a constant filtrate flux of 150 LMH. The binary mixture experiment was performed with 50% of each nanoparticle at the same total nanoparticle concentration as in the single nanoparticle experiments.

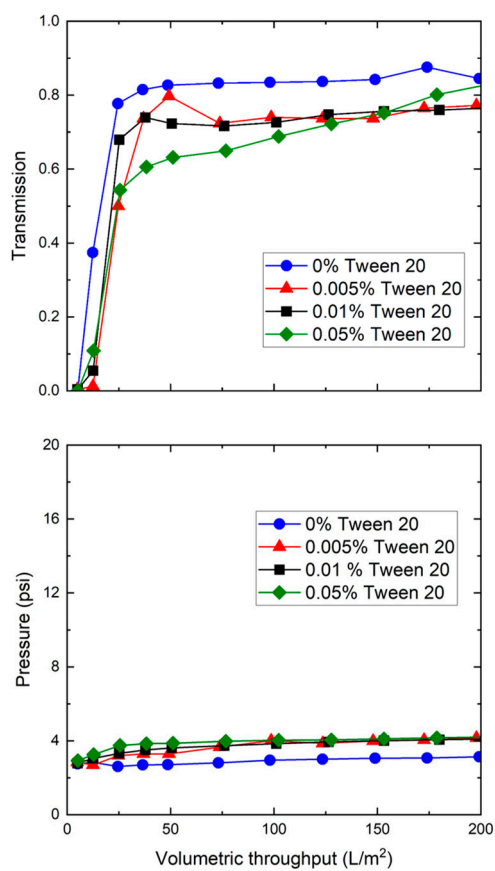

**Figure S3.** Effect of Tween 20 on nanoparticle transmission (top panel) and transmembrane pressure (bottom panel) during filtration of the 30 nm blue polystyrene nanoparticles through the 0.1  $\mu\text{m}$  mixed cellulose ester membranes at a constant filtrate flux of 150 LMH. Data obtained with suspensions having  $3.4 \times 10^{12}$  particles/mL in 10 mM Tris buffer.
